# Supplementary material for: Determinants of Polar versus Nematic Organization in Networks of Dynamic Microtubules and Mitotic Motors
Source: PubMed Central journal article supplement (PMC6198040; doi:10.1016/j.cell.2018.09.029), 2018-10-18
Supplement: mmc1.pdf [file mmc1.pdf]

**Cell, Volume 175**

**Supplemental Information**

**Determinants of Polar versus Nematic Organization  
in Networks of Dynamic Microtubules  
and Mitotic Motors**

**Johanna Roostalu, Jamie Rickman, Claire Thomas, François Nédélec, and Thomas Surrey**

**TABLE S1. Related to STAR Methods.**

| <b>Parameter</b>                              | <b>Value</b>                | <b>Note</b>                                                                       |
|-----------------------------------------------|-----------------------------|-----------------------------------------------------------------------------------|
| <b><i>Simulation</i></b>                      |                             |                                                                                   |
| Time step                                     | 0.01 s                      | Computational parameter. Smaller time step gave the same result.                  |
| Total time simulated                          | 50 mins                     | Similar to experiments                                                            |
| Geometry                                      | 40 x 40 x 0.4 $\mu\text{m}$ | Periodic boundary conditions in x and y-dimension. Confinement in z-dimension.    |
| <b><i>Experimental chamber</i></b>            |                             |                                                                                   |
| Viscosity                                     | 0.2 pN s/ $\mu\text{m}^2$   | ref (Letort et al., 2015)                                                         |
| <b><i>Microtubule</i></b>                     |                             |                                                                                   |
| Rigidity                                      | 30 pN $\mu\text{m}^2$       | ref (Dogterom and Yurke, 1997)                                                    |
| Steric radius                                 | 0.05 $\mu\text{m}$          | ref (Nogales et al., 1999)                                                        |
| Steric force constant ( $\kappa_s$ )          | 50 pN/ $\mu\text{m}$        | Constrained by strength of thermal fluctuations and force of motors.              |
| Average length (L)                            | 2.5 $\mu\text{m}$           |                                                                                   |
| Growth rate ( $v_g$ )                         | 0.005- 0.03 $\mu\text{m/s}$ | Measured in this study.                                                           |
| Shrinkage rate ( $v_s$ )                      | 0.5 $\mu\text{m/s}$         | ref (Walker et al., 1988)                                                         |
| Catastrophe rate ( $k_{\text{cat}}$ )         | 0.00067 - 0.012 /s          | Calculated as $v_g / L$ .                                                         |
| Sensitivity of growth to force ( $f_g$ )      | 1.67 pN                     | ref (Dogterom and Yurke, 1997)                                                    |
| Nucleation rate ( $k_{\text{nuc}}$ )          | 0.1 /s                      | Time for all microtubules to nucleate is short relative to total simulation time. |
| <b><i>Motor</i></b>                           |                             |                                                                                   |
| <b>Motor domain</b>                           |                             |                                                                                   |
| Stall force ( $f_{\text{stall}}$ )            | 5 pN                        | ref (Valentine et al., 2006)                                                      |
| Unbinding force ( $f_{\text{unbind}}$ )       | 5 pN                        | ref (Schnitzer et al., 2000)                                                      |
| Maximum motor speed ( $v_m$ )                 | 0.03 $\mu\text{m/s}$        | Measured in this study.                                                           |
| Binding radius ( $r_b$ )                      | 0.1 $\mu\text{m}$           | Twice the steric radius so motors can bind neighbouring microtubules.             |
| Binding rate ( $k_{\text{on}}$ )              | 5 /s                        | ref (Leduc et al., 2004)                                                          |
| Unbinding rate from side ( $k_{\text{off}}$ ) | 0.1 /s                      | From run length = 0.3 $\mu\text{m}$ , (Kapitein et al., 2005)                     |
| Unbinding rate from end ( $k_{\text{end}}$ )  | 0.1 /s                      | ref (Surrey et al., 2001)                                                         |
| <b>Dual motor complex</b>                     |                             |                                                                                   |
| Resting length ( $d_m$ )                      | 0.08 $\mu\text{m}$          | ref (Kashina et al., 1996)                                                        |
| Link stiffness ( $\kappa_m$ )                 | 100 pN/ $\mu\text{m}$       | ref (Loughlin et al., 2010)                                                       |
| <b>Discretization parameters</b>              |                             |                                                                                   |
| MT section length                             | 1 $\mu\text{m}$             | For bending elasticity.                                                           |
| MT initial length ( $L_0$ )                   | 0.025 $\mu\text{m}$         | Length of MTs when nucleated.                                                     |
| MT minimum length                             | 0.02 $\mu\text{m}$          | Shorter MTs are deleted.                                                          |
